# Supplementary material
Source: Frontiers journal article supplement (https://www.frontiersin.org/articles/295056)
Supplement: Image_1.PDF [file Image_1.PDF]

## Supplementary Material

### Pathophysiological role of transient receptor potential ankyrin 1 in a mouse long-lasting cystitis model induced by an intravesical injection of hydrogen peroxide

Shohei Oyama, Koji Dogishi, Mizuki Koderu, Masashi Kakaue, Kazuki Nagayasu, Hisashi Shirakawa, Takayuki Nakagawa, Shuji Kaneko

\* **Correspondence:** Takayuki Nakagawa: [tknakaga@kuhp.kyoto-u.ac.jp](mailto:tknakaga@kuhp.kyoto-u.ac.jp)

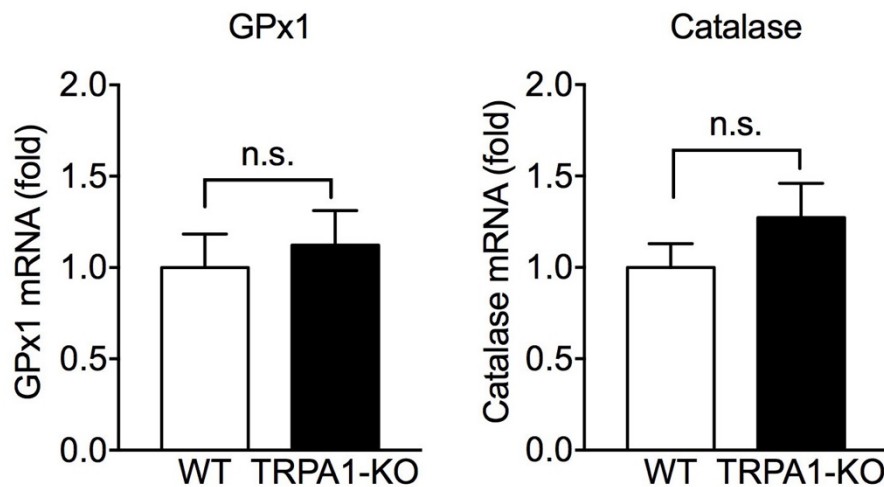

**Supplementary Figure 1.** No effect of TRPA1 deletion on the mRNA expression levels of glutathione peroxidase 1 (GPx1) and catalase in the bladder. Bladder was removed from WT or TRPA1-KO mice, and the levels of GPx1 and catalase mRNAs were measured by real-time RT-PCR. The values were normalized against 18S rRNA mRNA levels and presented relative to those of WT mice (set as 1). Values are means  $\pm$  S.E.M. for each group of 6 mice. n.s. = not significant (Student's *t*-test).
